# Supplementary material
Source: publisher site journal article supplement (https://static.cambridge.org/content/id/urn:cambridge.org:id:article:S1047198700012705/resource/name/supplementarytable2.rtf)
Supplement: Supplementary file 1 [file supplementarytable2.rtf]

\documentclass[letterpaper,oneside,fleqn,12pt]{article}
\usepackage[letterpaper,centering,vscale=0.76]{geometry}

\begin{document}
\setcounter{table}{1}

\begin{table}[ht!]
\caption{Full replication of Belke and Spies (2008).}
{\small
\begin{tabular*}{\textwidth}{cccccc}
\hline
& { (1)} & { (2)} & { (3)} & { (4)} & { (5)}
\\ 
& { POLS} & { FE} & { Stage 2} & { FEVD} & { HT%
} \\ \hline
\multicolumn{1}{l}{ lngdpim (log GDP of importer)} & \multicolumn{1}{l}{ 0.88***} & 
\multicolumn{1}{l}{ 0.68***} & \multicolumn{1}{l}{ .} & 
\multicolumn{1}{l}{ 0.68***} & \multicolumn{1}{l}{ 0.68***} \\ 
\multicolumn{1}{l}{} & \multicolumn{1}{l}{ (0.04)} & \multicolumn{1}{l}%
{ (0.11)} & \multicolumn{1}{l}{ .} & \multicolumn{1}{l}{ %
(0.01)} & \multicolumn{1}{l}{ (0.11)} \\ 
\multicolumn{1}{l}{ lngdpex (log GDP of exporter) } & \multicolumn{1}{l}{ 0.89***} & 
\multicolumn{1}{l}{ 0.71***} & \multicolumn{1}{l}{ .} & 
\multicolumn{1}{l}{ 0.71***} & \multicolumn{1}{l}{ 0.71***} \\ 
\multicolumn{1}{l}{} & \multicolumn{1}{l}{ (0.03)} & \multicolumn{1}{l}%
{ (0.07)} & \multicolumn{1}{l}{ .} & \multicolumn{1}{l}{ %
(0.01)} & \multicolumn{1}{l}{ (0.07)} \\ 
\multicolumn{1}{l}{ lrer (log bilat. exchange rate)} & \multicolumn{1}{l}{ -0.01} & 
\multicolumn{1}{l}{ 0.13**} & \multicolumn{1}{l}{ .} & 
\multicolumn{1}{l}{ 0.13***} & \multicolumn{1}{l}{ 0.13**} \\ 
\multicolumn{1}{l}{} & \multicolumn{1}{l}{ (0.01)} & \multicolumn{1}{l}%
{ (0.06)} & \multicolumn{1}{l}{ .} & \multicolumn{1}{l}{ %
(0.01)} & \multicolumn{1}{l}{ (0.06)} \\ 
\multicolumn{1}{l}{ ldist (log distance)} & \multicolumn{1}{l}{ -1.27***} & 
\multicolumn{1}{l}{ .} & \multicolumn{1}{l}{ -1.41***} & 
\multicolumn{1}{l}{ -1.41***} & \multicolumn{1}{l}{ -1.75***} \\ 
\multicolumn{1}{l}{} & \multicolumn{1}{l}{ (0.11)} & \multicolumn{1}{l}%
{ .} & \multicolumn{1}{l}{ (0.04)} & \multicolumn{1}{l}{ %
(0.00)} & \multicolumn{1}{l}{ (0.16)} \\ 
\multicolumn{1}{l}{ border (border length)} & \multicolumn{1}{l}{ -0.00} & 
\multicolumn{1}{l}{ .} & \multicolumn{1}{l}{ 0.00**} & 
\multicolumn{1}{l}{ 0.00***} & \multicolumn{1}{l}{ -0.00} \\ 
\multicolumn{1}{l}{} & \multicolumn{1}{l}{ (0.00)} & \multicolumn{1}{l}%
{ .} & \multicolumn{1}{l}{ (0.00)} & \multicolumn{1}{l}{ %
(0.00)} & \multicolumn{1}{l}{ (0.00)} \\ 
\multicolumn{1}{l}{ ll (land-locked categorical variable)} & \multicolumn{1}{l}{ -0.16*} & 
\multicolumn{1}{l}{ .} & \multicolumn{1}{l}{ -0.23***} & 
\multicolumn{1}{l}{ -0.23***} & \multicolumn{1}{l}{ -0.16} \\ 
\multicolumn{1}{l}{} & \multicolumn{1}{l}{ (0.10)} & \multicolumn{1}{l}%
{ .} & \multicolumn{1}{l}{ (0.04)} & \multicolumn{1}{l}{ %
(0.00)} & \multicolumn{1}{l}{ (0.14)} \\ 
\multicolumn{1}{l}{ cl (common language dummy)} & \multicolumn{1}{l}{ 0.23*} & 
\multicolumn{1}{l}{ .} & \multicolumn{1}{l}{ 0.13***} & 
\multicolumn{1}{l}{ 0.13***} & \multicolumn{1}{l}{ 0.02} \\ 
\multicolumn{1}{l}{} & \multicolumn{1}{l}{ (0.12)} & \multicolumn{1}{l}%
{ .} & \multicolumn{1}{l}{ (0.05)} & \multicolumn{1}{l}{ %
(0.00)} & \multicolumn{1}{l}{ (0.16)} \\ 
\multicolumn{1}{l}{ eu (European Union dummy)} & \multicolumn{1}{l}{ 0.08} & 
\multicolumn{1}{l}{ 0.03} & \multicolumn{1}{l}{ .} & 
\multicolumn{1}{l}{ 0.03***} & \multicolumn{1}{l}{ 0.03} \\ 
\multicolumn{1}{l}{} & \multicolumn{1}{l}{ (0.09)} & \multicolumn{1}{l}%
{ (0.05)} & \multicolumn{1}{l}{ .} & \multicolumn{1}{l}{ %
(0.01)} & \multicolumn{1}{l}{ (0.05)} \\ 
\multicolumn{1}{l}{ ea (Europe agreement dummy)} & \multicolumn{1}{l}{ 0.16*} & 
\multicolumn{1}{l}{ 0.22***} & \multicolumn{1}{l}{ .} & 
\multicolumn{1}{l}{ 0.22***} & \multicolumn{1}{l}{ 0.22***} \\ 
\multicolumn{1}{l}{} & \multicolumn{1}{l}{ (0.10)} & \multicolumn{1}{l}%
{ (0.06)} & \multicolumn{1}{l}{ .} & \multicolumn{1}{l}{ %
(0.01)} & \multicolumn{1}{l}{ (0.06)} \\ 
\multicolumn{1}{l}{ ewu (EWU member dummy)} & \multicolumn{1}{l}{ 0.13**} & 
\multicolumn{1}{l}{ 0.07**} & \multicolumn{1}{l}{ .} & 
\multicolumn{1}{l}{ 0.07**} & \multicolumn{1}{l}{ 0.07**} \\ 
\multicolumn{1}{l}{} & \multicolumn{1}{l}{ (0.05)} & \multicolumn{1}{l}%
{ (0.03)} & \multicolumn{1}{l}{ .} & \multicolumn{1}{l}{ %
(0.00)} & \multicolumn{1}{l}{ (0.03)} \\ 
\multicolumn{1}{l}{ lavrer3 (log multilat. exch. rate)} & \multicolumn{1}{l}{ 1.22***} & 
\multicolumn{1}{l}{ 0.45**} & \multicolumn{1}{l}{ .} & 
\multicolumn{1}{l}{ 0.45***} & \multicolumn{1}{l}{ 0.45***} \\ 
\multicolumn{1}{l}{} & \multicolumn{1}{l}{ (0.41)} & \multicolumn{1}{l}%
{ (0.22)} & \multicolumn{1}{l}{ .} & \multicolumn{1}{l}{ %
(0.03)} & \multicolumn{1}{l}{ (0.22)} \\ 
\multicolumn{1}{l}{ lavdist (log multilat. distance)} & \multicolumn{1}{l}{ 0.55***} & 
\multicolumn{1}{l}{ .} & \multicolumn{1}{l}{ 0.93***} & 
\multicolumn{1}{l}{ 0.93***} & \multicolumn{1}{l}{ 1.45***} \\ 
\multicolumn{1}{l}{} & \multicolumn{1}{l}{ (0.15)} & \multicolumn{1}{l}%
{ .} & \multicolumn{1}{l}{ (0.04)} & \multicolumn{1}{l}{ %
(0.00)} & \multicolumn{1}{l}{ 0.24)} \\ 
\multicolumn{1}{l}{ avborder (multilat. border)} & \multicolumn{1}{l}{ 0.00***} & 
\multicolumn{1}{l}{ .} & \multicolumn{1}{l}{ 0.01***} & 
\multicolumn{1}{l}{ 0.01***} & \multicolumn{1}{l}{ 0.01***} \\ 
\multicolumn{1}{l}{} & \multicolumn{1}{l}{ (0.00)} & \multicolumn{1}{l}%
{ .} & \multicolumn{1}{l}{ (0.00)} & \multicolumn{1}{l}{ %
(0.00)} & \multicolumn{1}{l}{ (0.00)} \\ 
\multicolumn{1}{l}{ avll (multilat. land-locked)} & \multicolumn{1}{l}{ -0.10***} & 
\multicolumn{1}{l}{ .} & \multicolumn{1}{l}{ -0.14***} & 
\multicolumn{1}{l}{ -0.14***} & \multicolumn{1}{l}{ -0.18***} \\ 
\multicolumn{1}{l}{} & \multicolumn{1}{l}{ (0.03)} & \multicolumn{1}{l}%
{ .} & \multicolumn{1}{l}{ (0.01)} & \multicolumn{1}{l}{ %
(0.00)} & \multicolumn{1}{l}{ (0.06)} \\ 
\multicolumn{1}{l}{ avcl (multilat. common language)} & \multicolumn{1}{l}{ -0.02} & 
\multicolumn{1}{l}{ .} & \multicolumn{1}{l}{ -0.40***} & 
\multicolumn{1}{l}{ -0.40***} & \multicolumn{1}{l}{ -0.44} \\ 
\multicolumn{1}{l}{} & \multicolumn{1}{l}{ (0.26)} & \multicolumn{1}{l}%
{ .} & \multicolumn{1}{l}{ (0.10)} & \multicolumn{1}{l}{ %
(0.00)} & \multicolumn{1}{l}{ (0.39)} \\ 
\multicolumn{1}{l}{ aveu (multilat. EU)} & \multicolumn{1}{l}{ -0.74***} & 
\multicolumn{1}{l}{ -0.22*} & \multicolumn{1}{l}{ .} & 
\multicolumn{1}{l}{ -0.22***} & \multicolumn{1}{l}{ -0.22*} \\ 
\multicolumn{1}{l}{} & \multicolumn{1}{l}{ (0.21)} & \multicolumn{1}{l}%
{ (0.12)} & \multicolumn{1}{l}{ .} & \multicolumn{1}{l}{ %
(0.01)} & \multicolumn{1}{l}{ (0.12)} \\ 
\multicolumn{1}{l}{ avea (multilat. EA)} & \multicolumn{1}{l}{ 0.34} & 
\multicolumn{1}{l}{ -0.07} & \multicolumn{1}{l}{ .} & 
\multicolumn{1}{l}{ -0.07***} & \multicolumn{1}{l}{ -0.07} \\ 
\multicolumn{1}{l}{} & \multicolumn{1}{l}{ (0.23)} & \multicolumn{1}{l}%
{ (0.10)} & \multicolumn{1}{l}{ .} & \multicolumn{1}{l}{ %
(0.01)} & \multicolumn{1}{l}{ (0.10)} \\ 
\multicolumn{1}{l}{ avewu (multilat. EWU)} & \multicolumn{1}{l}{ 0.22*} & 
\multicolumn{1}{l}{ 0.69***} & \multicolumn{1}{l}{ .} & 
\multicolumn{1}{l}{ 0.69***} & \multicolumn{1}{l}{ 0.69***} \\ 
\multicolumn{1}{l}{} & \multicolumn{1}{l}{ (0.12)} & \multicolumn{1}{l}%
{ (0.08)} & \multicolumn{1}{l}{ .} & \multicolumn{1}{l}{ %
(0.01)} & \multicolumn{1}{l}{ (0.08)} \\ 
\multicolumn{1}{l}{ hc1 (years of pair trade in sample)} & \multicolumn{1}{l}{ 0.09***} & 
\multicolumn{1}{l}{ .} & \multicolumn{1}{l}{ 0.10***} & 
\multicolumn{1}{l}{ 0.10***} & \multicolumn{1}{l}{ 0.09*} \\ 
\multicolumn{1}{l}{} & \multicolumn{1}{l}{ (0.03)} & \multicolumn{1}{l}%
{ .} & \multicolumn{1}{l}{ (0.01)} & \multicolumn{1}{l}{ %
(0.00)} & \multicolumn{1}{l}{ (0.05)} \\ 
\multicolumn{1}{l}{ hc3 (trading pair present at $t-1$)} & \multicolumn{1}{l}{ -0.18***} & 
\multicolumn{1}{l}{ -0.03} & \multicolumn{1}{l}{ .} & 
\multicolumn{1}{l}{ -0.03***} & \multicolumn{1}{l}{ -0.03} \\ 
\multicolumn{1}{l}{} & \multicolumn{1}{l}{ (0.04)} & \multicolumn{1}{l}%
{ (0.03)} & \multicolumn{1}{l}{ .} & \multicolumn{1}{l}{ %
(0.00)} & \multicolumn{1}{l}{ (0.03)} \\ 
\multicolumn{1}{l}{${\delta }$ (Stage 3 FEVD parameter)} & \multicolumn{1}{l}{ .} & 
\multicolumn{1}{l}{ .} & \multicolumn{1}{l}{ .} & 
\multicolumn{1}{l}{ 1.00***} & \multicolumn{1}{l}{ .} \\ 
\multicolumn{1}{l}{} & \multicolumn{1}{l}{ .} & \multicolumn{1}{l}%
{ .} & \multicolumn{1}{l}{ .} & \multicolumn{1}{l}{ (0.00)}
& \multicolumn{1}{l}{ .} \\ \hline
\end{tabular*}
}
{\footnotesize
Notes: One, two, and three asterisks reflect significance at the 0.10, 0.05, and 0.01 confidence levels,
respectively. Robust standard errors are in parentheses.}
\end{table}

\pagestyle{empty}
\end{document}
